CORRECTION

# Correction: Spatial Variation of Phosphorous Retention Capacity in Subsurface Flow Constructed Wetlands: Effect of Wetland Type and Inflow Loading

Guangwei Yu, Meijuan Tan, Yunxiao Chong, Xinxian Long

There is an error in the Funding section. The correct funding information is as follows: The study was funded by National Natural Science Foundation of China (No. 51378226). It had an important role in study design, data collection and analysis.

## Reference

1. Yu G, Tan M, Chong Y, Long X (2015) Spatial Variation of Phosphorous Retention Capacity in Subsurface Flow Constructed Wetlands: Effect of Wetland Type and Inflow Loading. PLoS ONE 10(7): e0134010. doi: [10.1371/journal.pone.0134010](https://doi.org/10.1371/journal.pone.0134010) PMID: [26218872](https://pubmed.ncbi.nlm.nih.gov/26218872/)

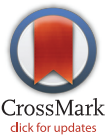

## OPEN ACCESS

**Citation:** Yu G, Tan M, Chong Y, Long X (2016) Correction: Spatial Variation of Phosphorous Retention Capacity in Subsurface Flow Constructed Wetlands: Effect of Wetland Type and Inflow Loading. PLoS ONE 11(2): e0149705. doi:10.1371/journal.pone.0149705

**Published:** February 12, 2016

**Copyright:** © 2016 Yu et al. This is an open access article distributed under the terms of the [Creative Commons Attribution License](https://creativecommons.org/licenses/by/4.0/), which permits unrestricted use, distribution, and reproduction in any medium, provided the original author and source are credited.
